# Supplementary material for: Influence of N-protonation on electronic properties of acridine derivatives by quantum crystallography
Source: Royal Society of Chemistry journal article supplement (doi:10.1039/d3ra08081a), 2024-01-01
Supplement: d3ra08081a1.pdf [file d3ra08081a1.pdf]

## Influence of N-protonation on electronic properties of acridine derivatives by quantum crystallography

Sylwia Pawłędzio<sup>1,2\*</sup>, Marcin Ziemiak<sup>2</sup>, Damian Trzybiński<sup>2</sup>, Mihails Arhangeliskis<sup>2</sup>, Anna Makal<sup>2</sup>, Krzysztof Woźniak<sup>2\*</sup>

Corresponding author: pawledzios@ornl.gov, kwozniak@chem.uw.edu.pl

<sup>1</sup> Neutron Scattering Division, Oak Ridge National Laboratory, Oak Ridge, TN 37831, USA

<sup>2</sup> Biological and Chemical Research Centre, Department of Chemistry, University of Warsaw, Żwirki i Wigury 101, 02-093 Warszawa, Poland

**Table S1.** X–H bond lengths in Å after HAR and TAAM refinements for **9aa**\*H<sub>2</sub>O form.

| <b>Bond</b> | <b>IAM</b> | <b>HAR</b> |
|-------------|------------|------------|
| N1A–H12A    | 0.86(2)    | 1.01(2)    |
| C2A–H2A     | 0.93       | 1.091(19)  |
| C3A–H3A     | 0.93       | 1.074(19)  |
| C4A–H4A     | 0.93       | 1.124(19)  |
| C5A–H5A     | 0.93       | 1.077(19)  |
| H12B–N1B    | 0.89(2)    | 1.031(19)  |
| C2B–H2B     | 0.93       | 1.075(17)  |
| C3B–H3B     | 0.93       | 1.050(18)  |
| C4B–H4B     | 0.93       | 1.121(19)  |
| C5B–H5B     | 0.93       | 1.098(19)  |
| O1–H15      | 0.85       | 0.96(2)    |

**Table S2.** X–H bond lengths in Å after HAR and MM refinements for **9aa**\*HCl form.

| <b>Bond</b> | <b>IAM</b> | <b>HAR</b> |
|-------------|------------|------------|
| O1–H16      | 0.790(13)  | 0.948(7)   |
| O1–H15      | 0.849(12)  | 0.973(6)   |
| N2–H14      | 0.886(11)  | 1.050(5)   |
| N1–H13      | 0.880(10)  | 1.021(5)   |
| N1–H12      | 0.879(10)  | 1.022(5)   |
| C11–H11     | 0.933(10)  | 1.085(4)   |
| C5–H5       | 0.953(10)  | 1.075(5)   |
| C2–H2       | 0.958(10)  | 1.088(5)   |
| C9–H9       | 0.964(10)  | 1.079(5)   |
| C4–H4       | 0.952(9)   | 1.066(4)   |
| C8–H8       | 0.986(10)  | 1.072(5)   |
| C10–H10     | 0.999(9)   | 1.085(5)   |
| C3–H3       | 0.937(10)  | 1.083(5)   |

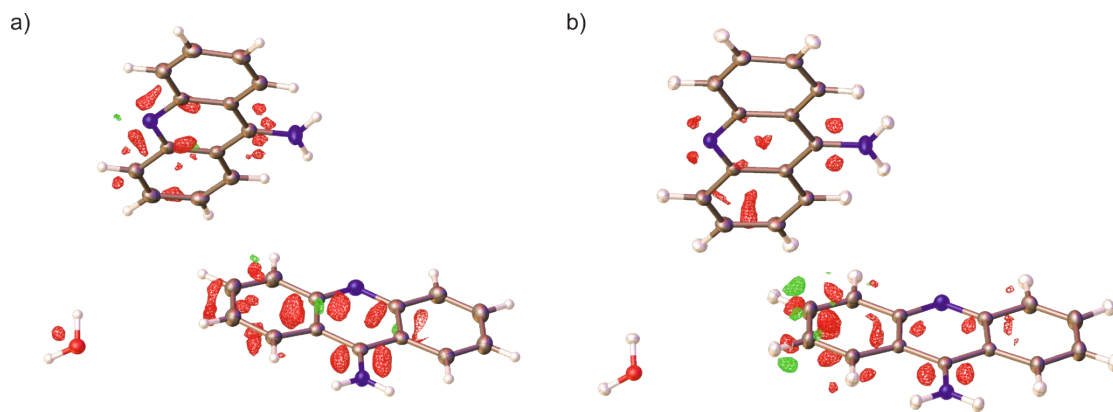

**Figure S1.** 2D visualization of the residual density (eÅ<sup>-3</sup>) after a) IAM and b) HAR models for 9aa\*H<sub>2</sub>O form.

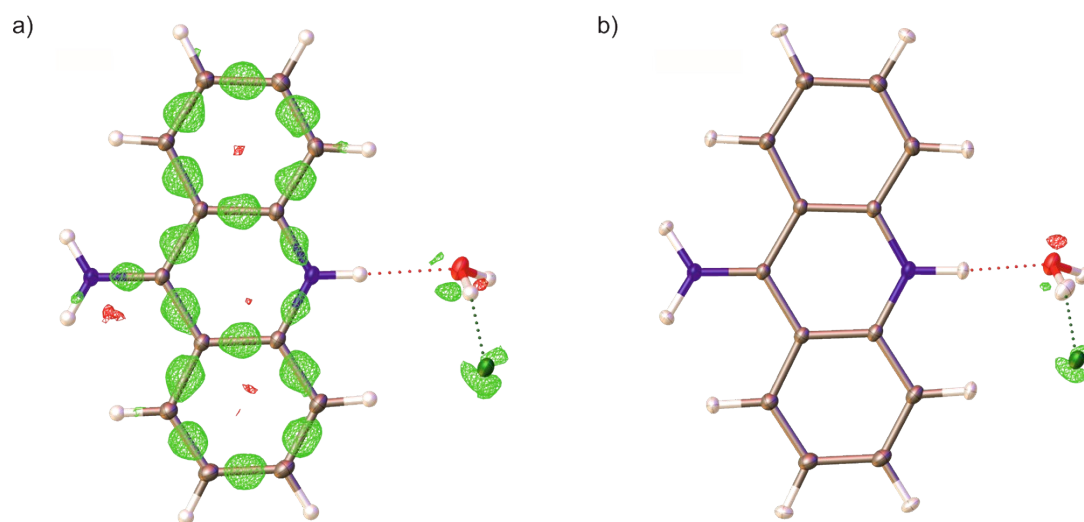

**Figure S2.** 2D visualization of the residual density (eÅ<sup>-3</sup>) after a) IAM and b) HAR models for 9aa\*HCl form.

**Table S3.** QTAIM parameters at BCPs for **9aa**\*H<sub>2</sub>O from HAR model.

| Bond     | d (Å)     | HAR                                        |                                                    |            |
|----------|-----------|--------------------------------------------|----------------------------------------------------|------------|
|          |           | $\rho_{\text{BCP}}$<br>(eÅ <sup>-3</sup> ) | $\nabla^2\rho_{\text{BCP}}$<br>(eÅ <sup>-5</sup> ) | $\epsilon$ |
| N1A–C13A | 1.344(2)  | 2.21                                       | -23.75                                             | 0.05       |
| N1A–H12A | 1.01(2)   | 2.27                                       | -39.43                                             | 0.04       |
| N2A–C6A  | 1.351(2)  | 2.25                                       | -26.95                                             | 0.09       |
| C1A–C2A  | 1.425(2)  | 1.95                                       | -16.28                                             | 0.16       |
| C2A–C3A  | 1.366(2)  | 2.17                                       | -19.55                                             | 0.26       |
| C3A–C4A  | 1.415(2)  | 2.00                                       | -17.25                                             | 0.15       |
| C4A–C5A  | 1.366(2)  | 2.18                                       | -19.67                                             | 0.25       |
| C5A–C6A  | 1.426(2)  | 1.98                                       | -17.19                                             | 0.17       |
| C1A–C6A  | 1.425(2)  | 1.98                                       | -16.68                                             | 0.18       |
| C1A–C13A | 1.425(1)  | 1.98                                       | -17.00                                             | 0.17       |
| C2A–H2A  | 1.091(19) | 1.89                                       | -25.08                                             | 0.02       |
| C3A–H3A  | 1.074(19) | 1.91                                       | -25.82                                             | 0.02       |
| C4A–H4A  | 1.124(19) | 1.76                                       | -22.20                                             | 0.01       |
| C5A–H5A  | 1.077(19) | 1.96                                       | -27.13                                             | 0.02       |
| N1B–H12B | 1.031(19) | 2.12                                       | -35.82                                             | 0.04       |
| N1B–C13B | 1.336(2)  | 2.25                                       | -23.38                                             | 0.06       |
| N2B–C6B  | 1.357(1)  | 2.23                                       | -26.17                                             | 0.10       |
| C1B–C2B  | 1.425(2)  | 1.95                                       | -16.27                                             | 0.17       |
| C2B–C3B  | 1.369(2)  | 2.16                                       | -19.27                                             | 0.25       |
| C3B–C4B  | 1.417(2)  | 1.99                                       | -17.20                                             | 0.15       |
| C4B–C5B  | 1.369(2)  | 2.16                                       | -19.37                                             | 0.25       |
| C5B–C6B  | 1.432(2)  | 1.96                                       | -16.81                                             | 0.17       |
| C1B–C6B  | 1.423(2)  | 1.99                                       | -16.79                                             | 0.18       |
| C1B–C13B | 1.429(2)  | 1.96                                       | -16.77                                             | 0.17       |
| C2B–H2B  | 1.075(17) | 1.95                                       | -26.71                                             | 0.02       |
| C3B–H3B  | 1.050(18) | 2.02                                       | -28.99                                             | 0.02       |
| C4B–H4B  | 1.121(19) | 1.77                                       | -22.39                                             | 0.01       |
| C5B–H5B  | 1.098(19) | 1.87                                       | -24.77                                             | 0.02       |
| O1–H15   | 0.96(2)   | 2.35                                       | -57.45                                             | 0.02       |

**Table S4.** QTAIM parameters at BCPs for **9aa\*HCl** form HAR model.

| Bond    | d (Å)     | HAR                                        |                                                    |            |
|---------|-----------|--------------------------------------------|----------------------------------------------------|------------|
|         |           | $\rho_{\text{BCP}}$<br>(eÅ <sup>-3</sup> ) | $\nabla^2\rho_{\text{BCP}}$<br>(eÅ <sup>-5</sup> ) | $\epsilon$ |
| N2-C6   | 1.3607(2) | 2.14                                       | -22.74                                             | 0.07       |
| N2-C7   | 1.3605(2) | 2.14                                       | -22.83                                             | 0.07       |
| N2-H14  | 1.050(5)  | 2.02                                       | -34.09                                             | 0.03       |
| N1-C13  | 1.3233(2) | 2.32                                       | -24.41                                             | 0.07       |
| N1-H13  | 1.021(5)  | 2.16                                       | -37.11                                             | 0.03       |
| N1-H12  | 1.022(5)  | 2.16                                       | -37.30                                             | 0.03       |
| C12-C7  | 1.4110(2) | 2.03                                       | -17.63                                             | 0.20       |
| C1-C6   | 1.4098(2) | 2.03                                       | -17.52                                             | 0.20       |
| C1-C2   | 1.4187(2) | 1.97                                       | -16.52                                             | 0.17       |
| C2-C3   | 1.3733(2) | 2.15                                       | -19.12                                             | 0.24       |
| C3-C4   | 1.4105(3) | 2.01                                       | -17.39                                             | 0.16       |
| C4-C5   | 1.3742(3) | 2.15                                       | -19.14                                             | 0.24       |
| C5-C6   | 1.4149(2) | 2.01                                       | -17.45                                             | 0.18       |
| C7-C8   | 1.4153(2) | 2.01                                       | -17.52                                             | 0.18       |
| C8-C9   | 1.3729(3) | 2.14                                       | -19.03                                             | 0.24       |
| C9-C10  | 1.4120(3) | 2.02                                       | -17.48                                             | 0.16       |
| C10-C11 | 1.3730(2) | 2.14                                       | -19.10                                             | 0.24       |
| C11-C12 | 1.4201(2) | 1.97                                       | -16.61                                             | 0.17       |
| C12-C13 | 1.4370(2) | 1.94                                       | -16.59                                             | 0.15       |
| C1-C13  | 1.4380(2) | 1.94                                       | -16.63                                             | 0.15       |
| C2-H2   | 1.088(5)  | 1.92                                       | -26.56                                             | 0.01       |
| C3-H3   | 1.083(5)  | 1.89                                       | -25.08                                             | 0.02       |
| C4-H4   | 1.066(4)  | 1.93                                       | -26.54                                             | 0.01       |
| C5-H5   | 1.075(5)  | 1.95                                       | -27.21                                             | 0.02       |
| C8-H8   | 1.072(5)  | 1.94                                       | -26.97                                             | 0.02       |
| C9-H9   | 1.079(5)  | 1.98                                       | -27.79                                             | 0.01       |
| C10-H10 | 1.085(5)  | 1.90                                       | -25.83                                             | 0.02       |
| C11-H11 | 1.085(4)  | 1.91                                       | -26.25                                             | 0.01       |
| O1-H16  | 0.948(7)  | 2.25                                       | -55.10                                             | 0.02       |
| O1-H15  | 0.973(6)  | 2.41                                       | -65.82                                             | 0.02       |

**Table S5.** Contribution of each type of interatomic contact to the overall Hirshfeld surface for aa9 residues (either in neutral form or protonated) in selected PDB entries expressed in percent [%].

| Type of contact | 6o4x      | 6o4x         | 3tzb      | 3tzb         |
|-----------------|-----------|--------------|-----------|--------------|
|                 | (neutral) | (protonated) | (neutral) | (protonated) |
| N···H           | 4.9       | 3.2          | 4.9       | 4.7          |
| C···H           | 18.4      | 18.1         | 17.7      | 18.2         |
| O···H           | 12.6      | 12.9         | 16.8      | 16.7         |
| H···H           | 49.0      | 51.5         | 49.6      | 50.6         |
| C···N           | 2.1       | 1.9          | 2.7       | 1.9          |
| C···O           | 2.4       | 2.2          | 0.7       | 0.7          |
| C···C           | 9.0       | 8.6          | 6.9       | 6.6          |
| N···O           | 1.5       | 1.5          | 0.0       | 0.0          |
| N···N           | 0.0       | 0.0          | 0.6       | 0.5          |

a)

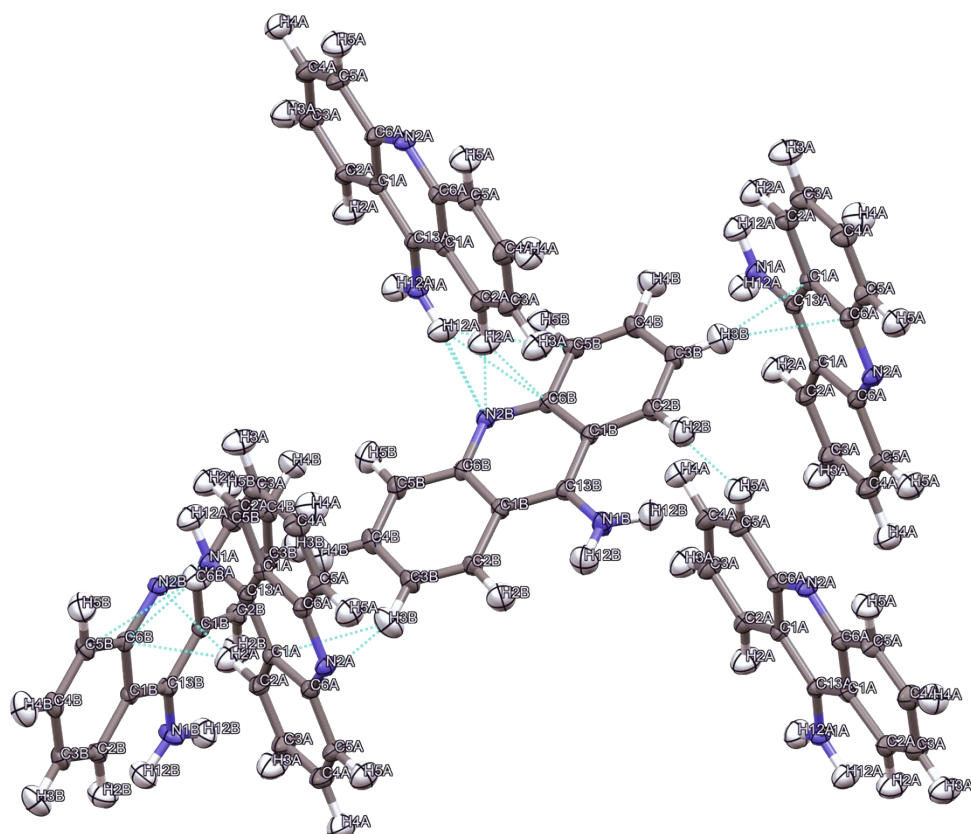

b)

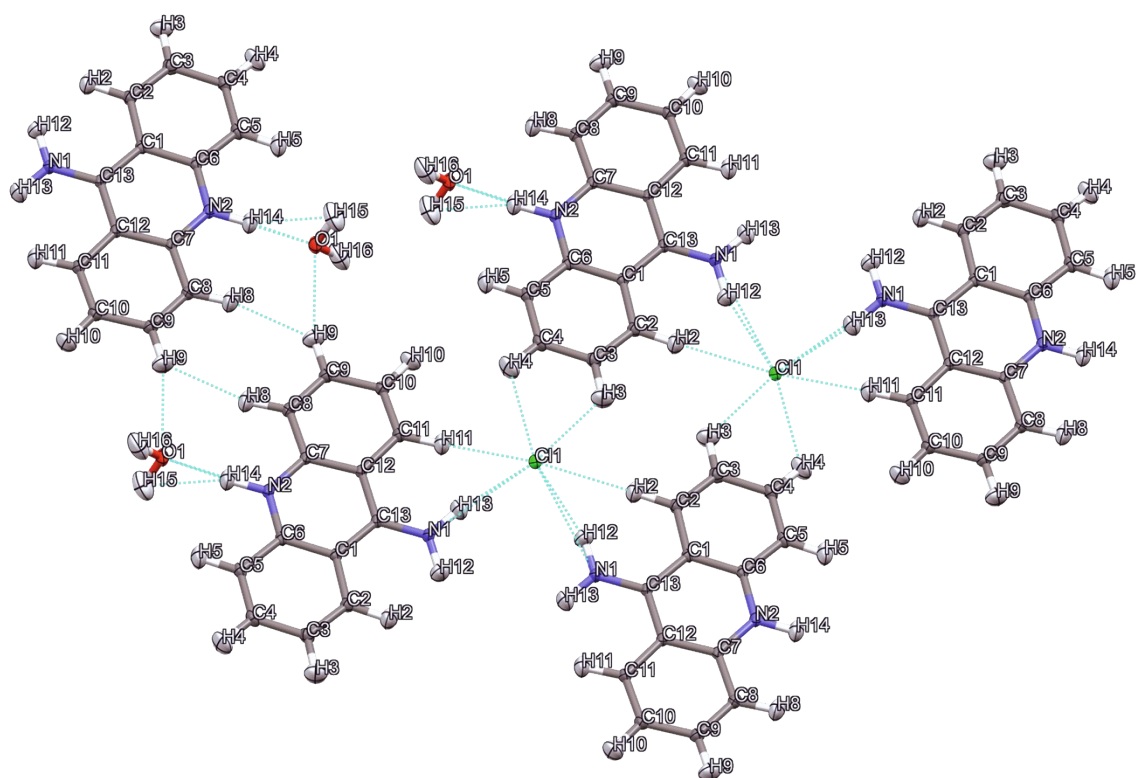

**Figure S3.** Molecular arrangements of a) 9aa\*H<sub>2</sub>O and b) 9aa\*HCl forms showing the intermolecular interactions of aminacrine.

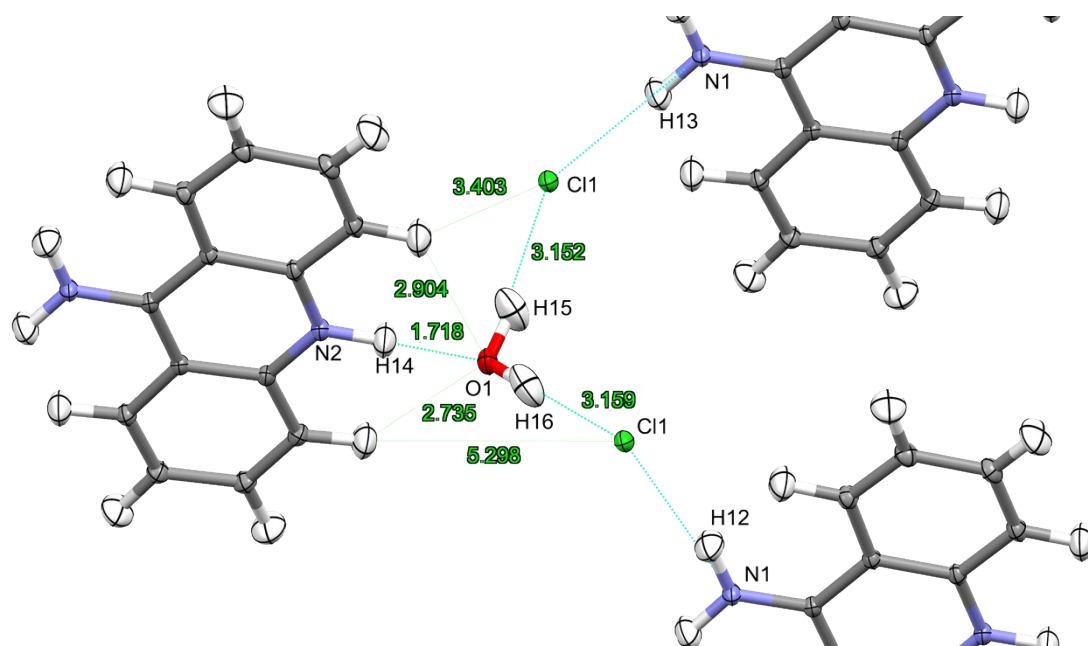

**Figure S4.** Distances of intermolecular interactions for a water molecule in the crystal structure of **9aa\*HCl**.

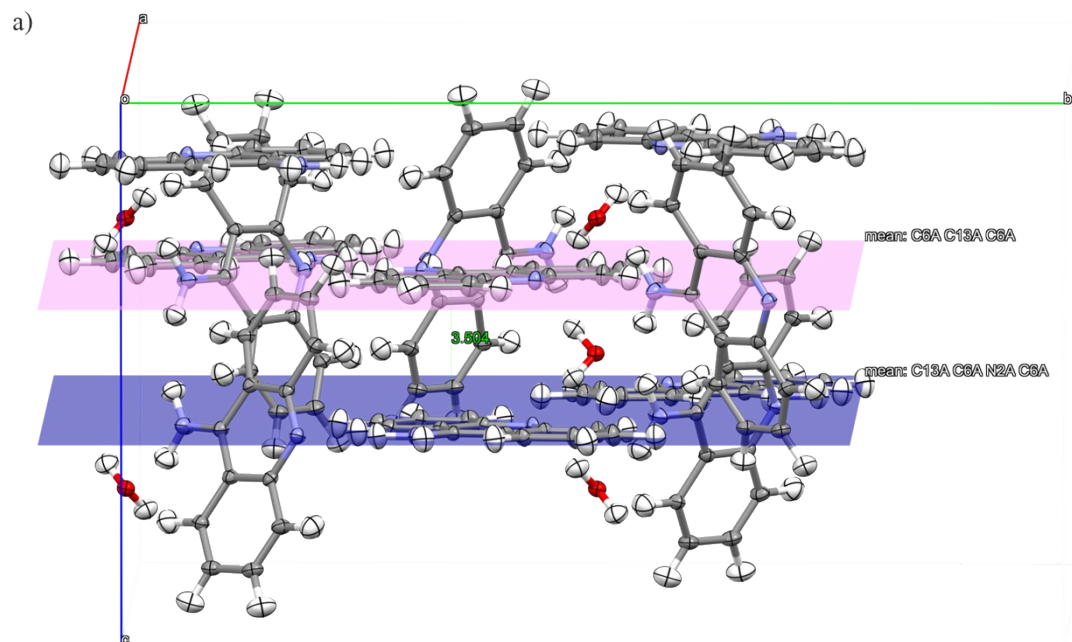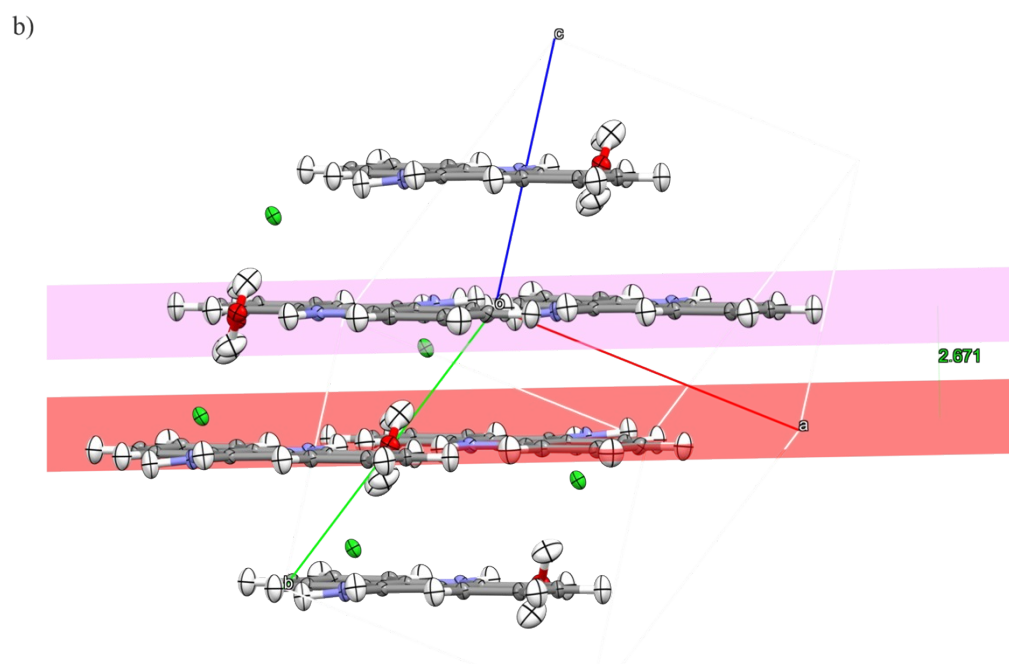

**Figure S5.** The molecular arrangement of crystal structures of (a) **9aa\*H<sub>2</sub>O** and (b) **9aa\*HCl** with the measured distances between the layers. The distances were measured between the average planes of the subsequent molecular layers defined on the aminacrine rings.

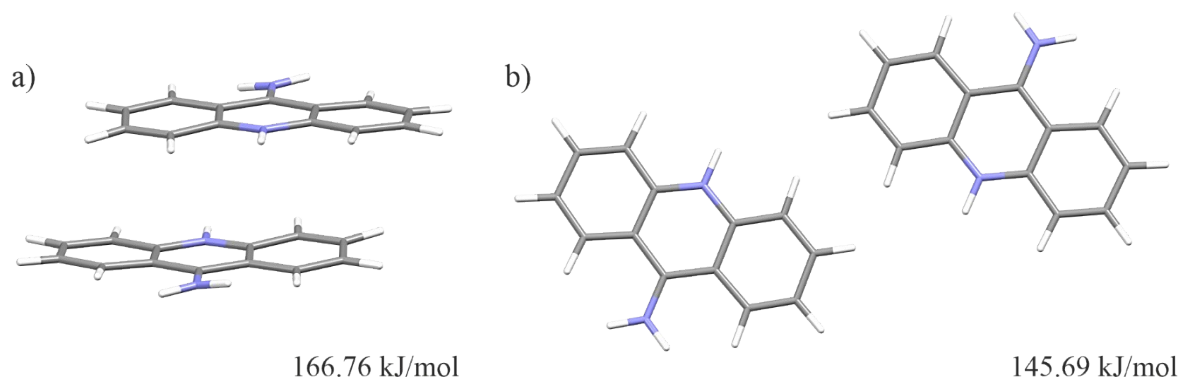

**Figure S6.** Dimer of interacting molecules for **9aa\*HCl** form.

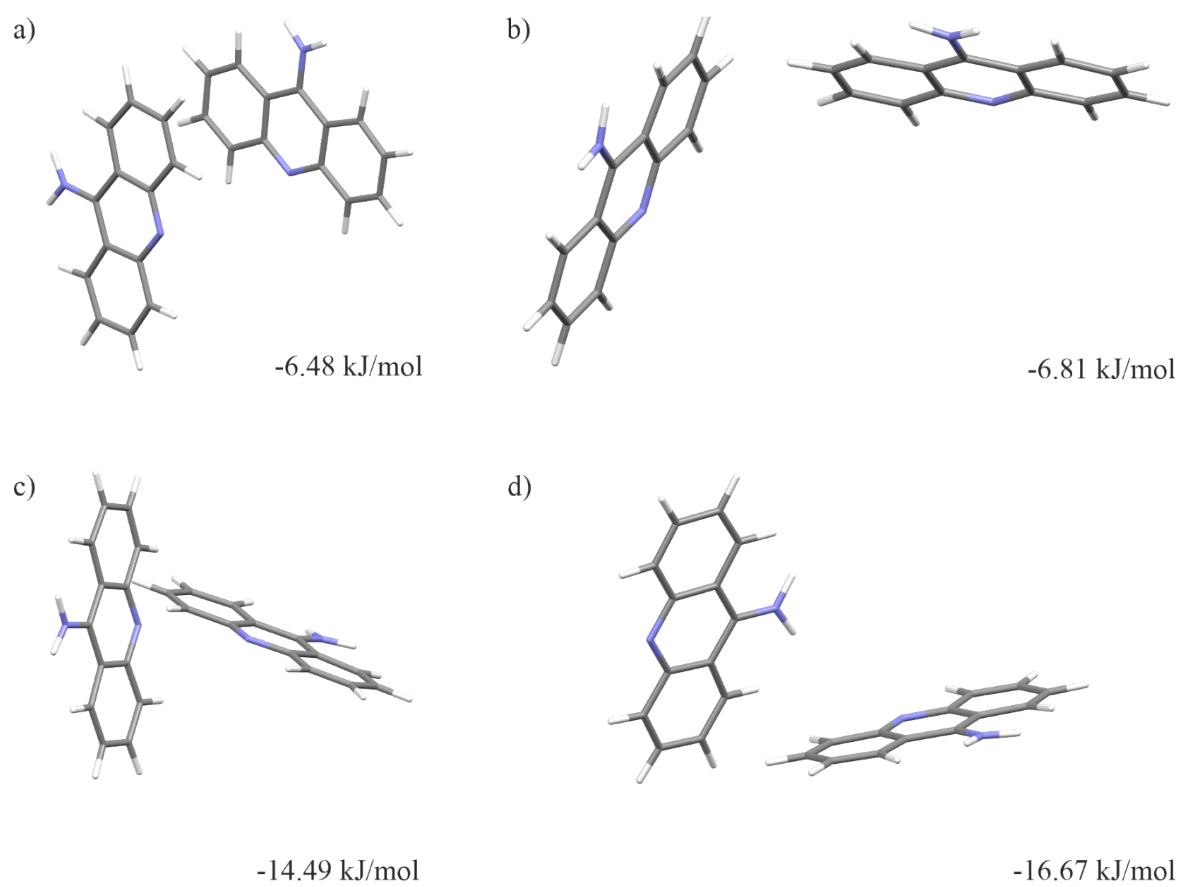

**Figure S7.** Dimer of interacting molecules for **9aa\*H<sub>2</sub>O** form.



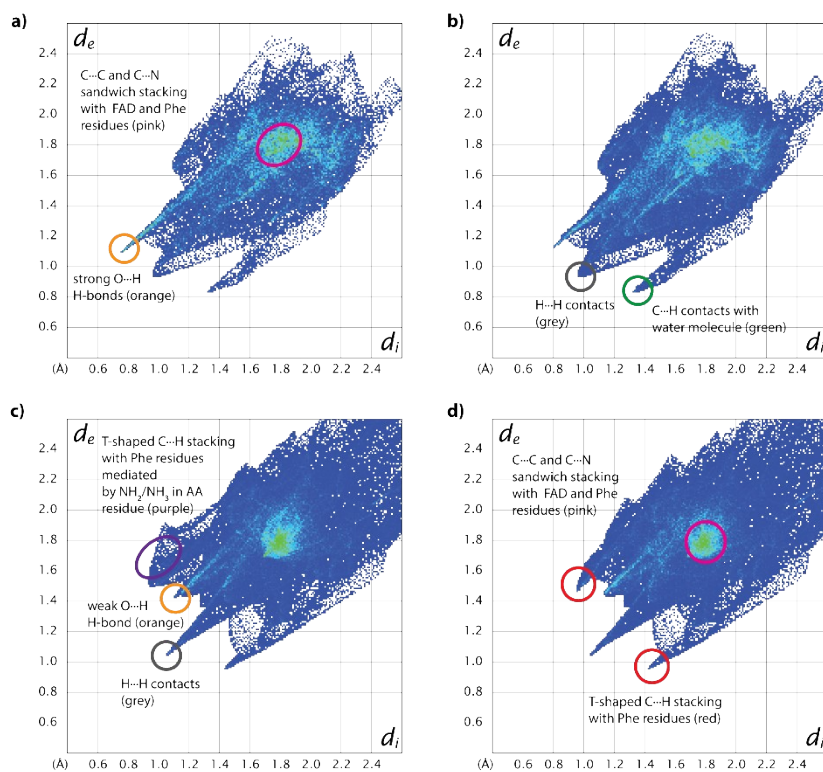

**Figure S8.** HS fingerprint plots of **9aa** ligands in selected protein structures: 6o4x (human AChE) in neutral (a) or protonated form (b), and 3tzb (quinone oxidoreductase) in neutral (c) and protonated (d).

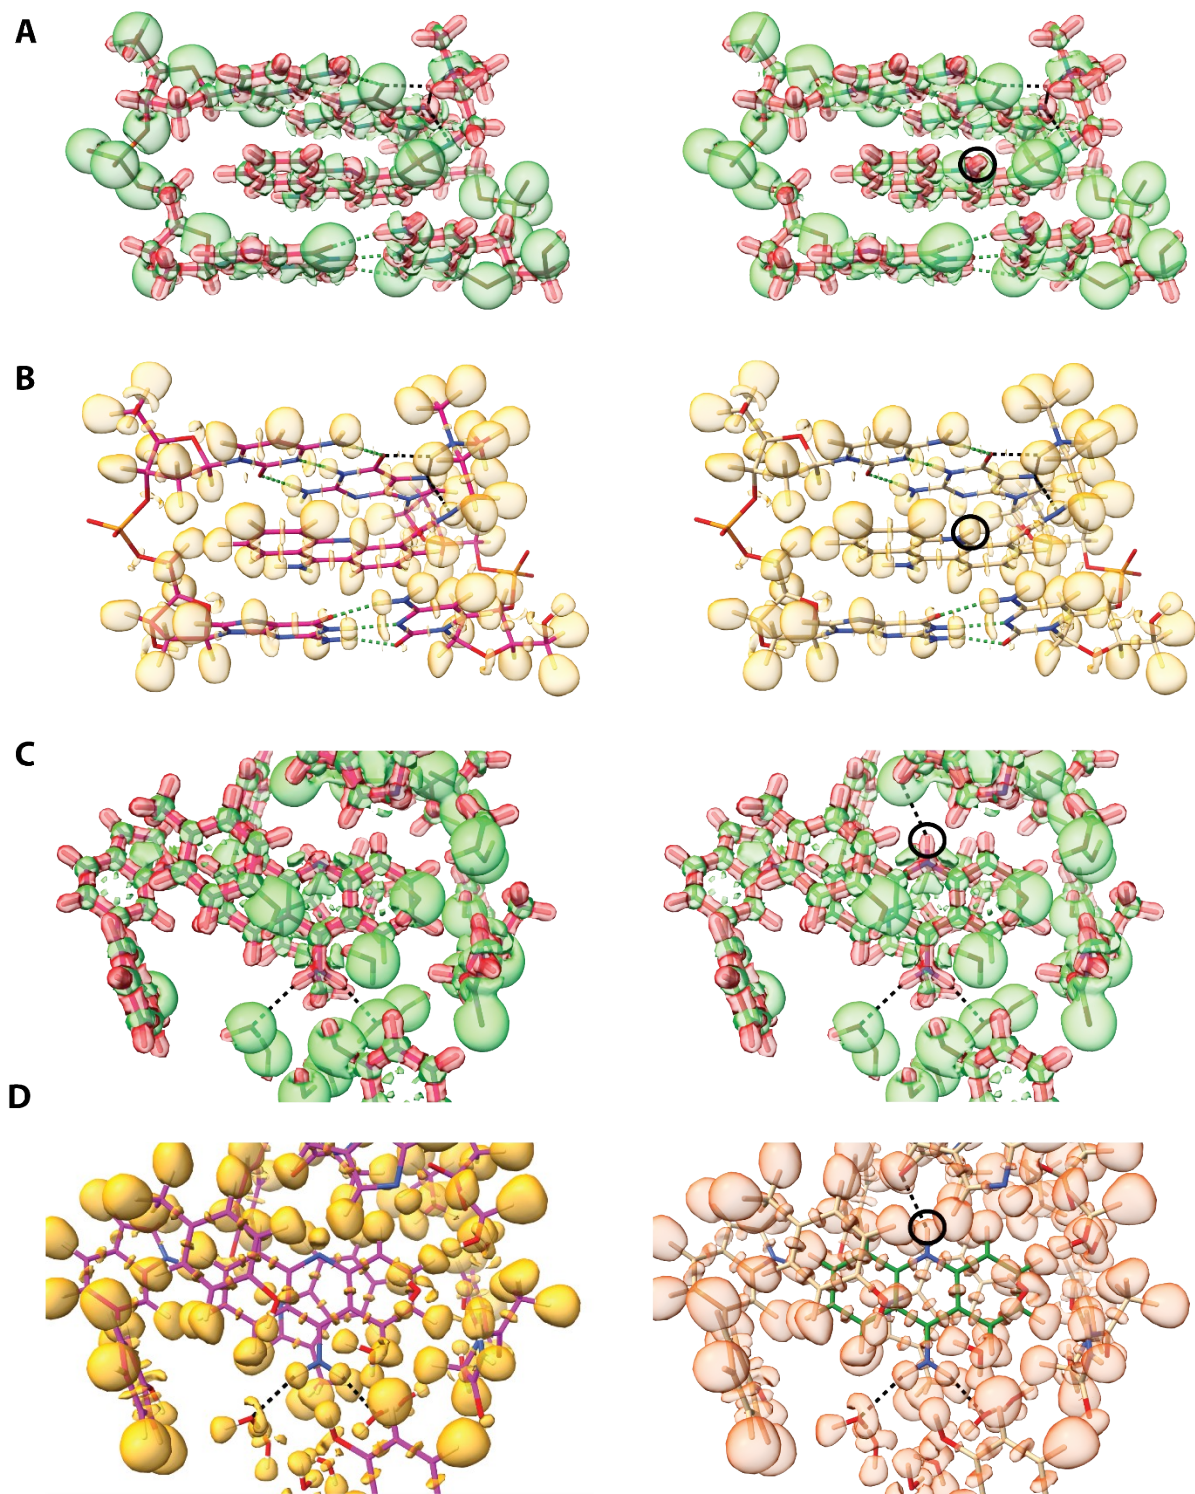

**Figure S9.** Isosurfaces of electron density functions for macromolecular complexes. Contour levels are  $-0.23$  (red) and  $+0.23$  (green)  $eA^{-5}$  for Laplacian and  $0.9$  for ELF. **A.** ED Laplacian for neutral (left) and protonated (right) form of 9aa complexed by DNA. **B.** ELF for neutral (left) and protonated (right) form of 9aa complexed by DNA. **C.** ED Laplacian for neutral (left) and protonated (right) form of 9aa bound by human acetylcholinesterase. **D.** ELF for neutral (left) and protonated (right) form of 9aa bound by human acetylcholinesterase.

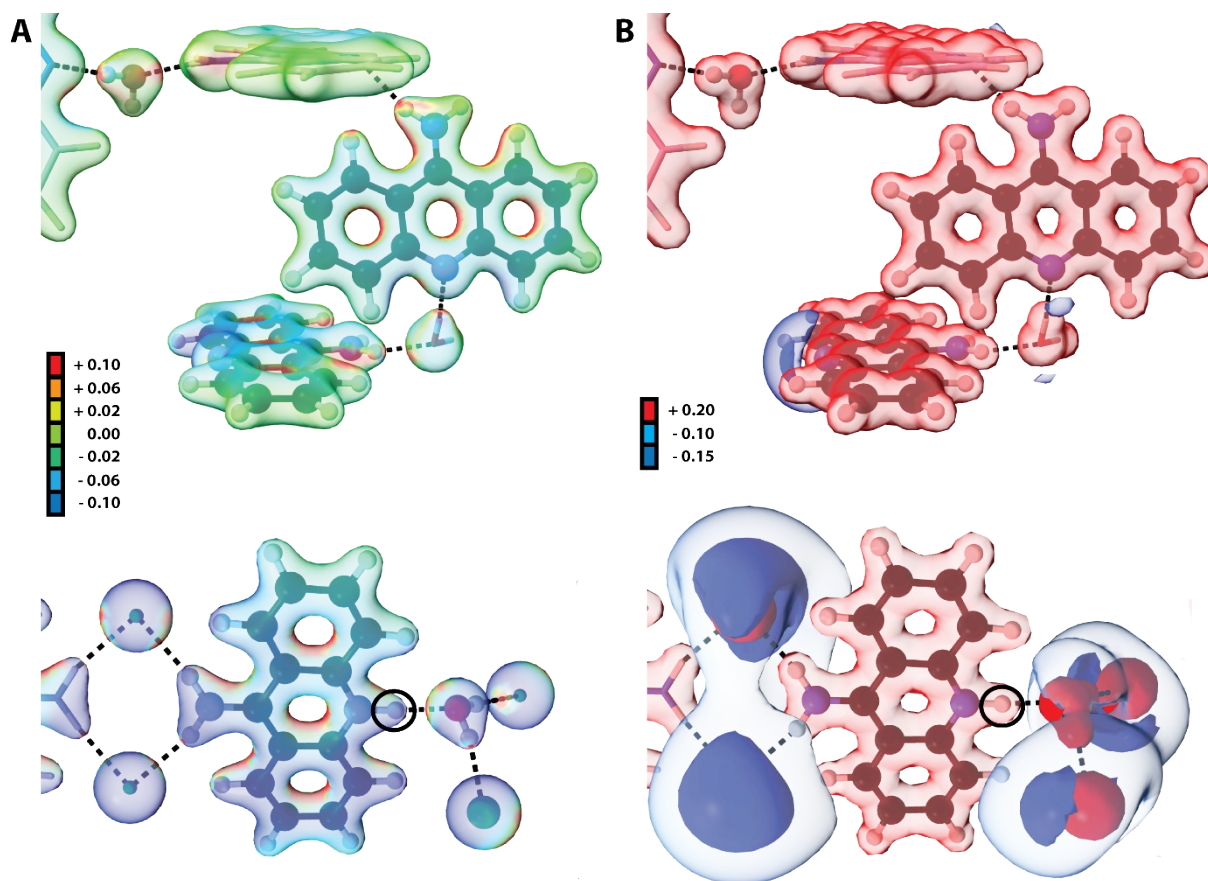

**Figure S10.** A. Electrostatic potential mapped on isosurfaces of electron density (contour  $0.08 \text{ eA}^{-3}$ ) prepared using rainbow gradient colouring scheme where lowest ESP values are blue and highest are red ( $-0.1$  to  $+0.1 \text{ E}_h \text{ e}^{-1}$ ) for crystal structures of **9aa** in neutral (top) and protonated form (bottom). B. Isosurfaces of electrostatic potential at several values for crystal structures of **9aa** in neutral (left) and protonated form (right). For both forms of **9aa** the asymmetric unit is depicted in ball-stick representation and selected adjacent molecules in crystal are depicted as sticks. H-bonds are presented as black dotted lines. Black circles indicate protonation site.

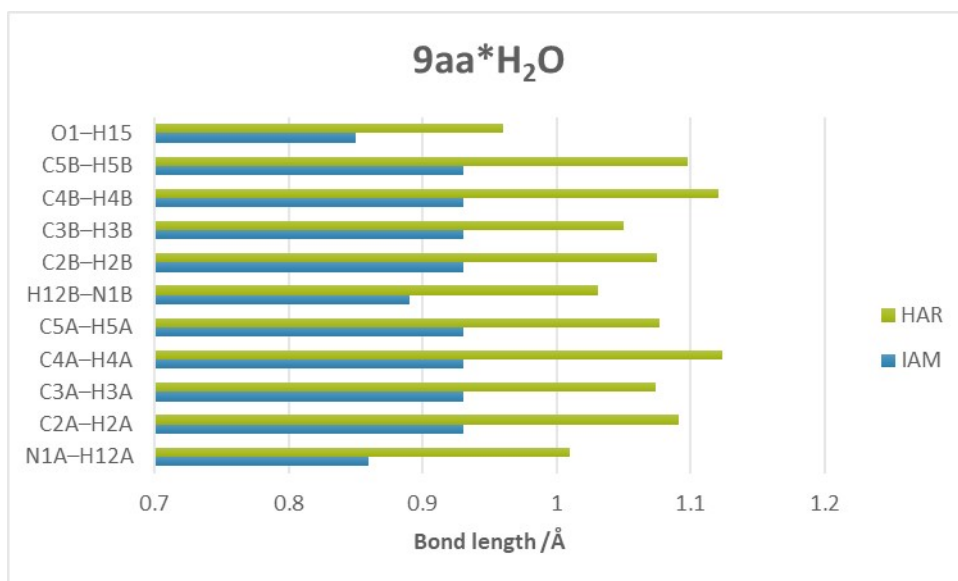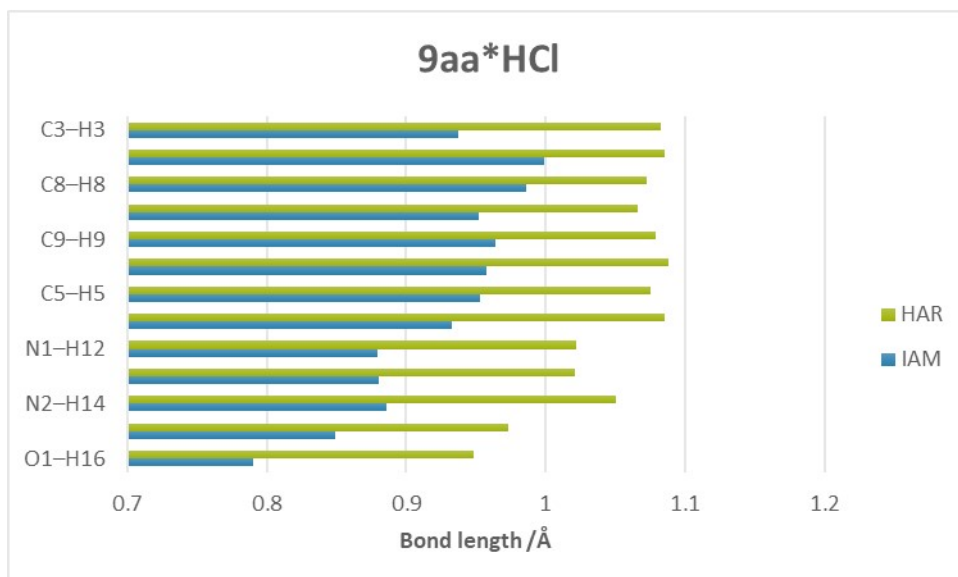

**Figure S11.** Graph representation of the *X* – H bond lengths obtained from IAM and HAR for both studied forms.
